# Supplementary material for: Prediction and analysis of Corona Virus Disease 2019
Source: PLoS One. 2020 Oct 5;15(10):e0239960. doi: 10.1371/journal.pone.0239960 (PMC7535054; doi:10.1371/journal.pone.0239960)
Supplement: S2 Data — (XLSX) [file pone.0239960.s002.xlsx]

## Sheet: Wuhan
Date	Cumulative confirmed cases	Confirmed new cases	Cumulative deaths	New deaths	Cumulative cured cases	New cured cases
2020-01-23	495	70	23	6	31	3
2020-01-24	572	77	38	15	32	1
2020-01-25	618	46	45	7	40	8
2020-01-26	698	80	63	18	42	2
2020-01-27	1590	892	85	22	45	3
2020-01-28	1905	315	104	19	75	30
2020-01-29	2261	356	129	25	82	7
2020-01-30	2639	378	159	30	103	21
2020-01-31	3215	576	192	33	139	36
2020-02-01	4109	894	224	32	171	32
2020-02-02	5142	1033	265	41	224	53
2020-02-03	6384	1242	313	48	303	79
2020-02-04	8351	1967	362	49	368	65
2020-02-05	10117	1766	414	52	431	63
2020-02-06	11618	1501	478	64	534	103
2020-02-07	13603	1985	545	67	698	164
2020-02-08	14982	1379	608	63	877	179
2020-02-09	16902	1920	681	73	1044	167
2020-02-10	18454	1552	748	67	1206	162
2020-02-11	19558	1104	820	72	1377	171
2020-02-12	32994	13436	928	108	1915	538
2020-02-13	35991	3910	1016	88	2016	101
2020-02-14	37914	1923	1123	107	2502	486
2020-02-15	39462	1548	1233	110	2915	413
2020-02-16	41152	1690	1309	76	3458	543
2020-02-17	42752	1600	1381	72	4219	761
2020-02-18	44412	1660	1497	116	4895	676
2020-02-19	45027	615	1585	88	5448	553
2020-02-20	45346	319	1684	99	6214	766
2020-02-21	45660	314	1774	90	7206	992
2020-02-22	46201	541	1856	82	8171	965
2020-02-23	46607	348	1987	131	8946	772
2020-02-24	47071	464	2043	56	10337	1391
2020-02-25	47441	370	2085	42	11793	1456
2020-02-26	47824	383	2104	19	13328	1535
2020-02-27	48137	313	2132	28	15826	2498
2020-02-28	48557	420	2169	37	17552	1726
2020-02-29	49122	565	2195	26	19227	1675
2020-03-01	49315	193	2227	32	21185	1958
2020-03-02	49426	111	2251	24	23031	1846
2020-03-03	49540	114	2282	31	24890	1859
2020-03-04	49671	131	2305	23	26316	1426
2020-03-05	49797	126	2328	23	27354	1038
2020-03-06	49871	74	2349	21	28511	1157
2020-03-07	49912	41	2370	21	29770	1259
2020-03-08	49948	36	2388	18	30933	1163
2020-03-09	49965	17	2404	16	31829	896
2020-03-10	49978	13	2423	19	33041	1212
2020-03-11	49986	8	2430	7	34094	1053
2020-03-12	49991	5	2436	6	35197	1103
2020-03-13	49995	4	2446	10	36451	1254
2020-03-14	49999	4	2456	10	37632	1181
2020-03-15	50003	4	2469	13	38384	752
2020-03-16	50004	1	2480	11	39220	836
2020-03-17	50005	1	2490	10	40032	812
2020-03-18	50005	0	2496	6	40765	733
2020-03-19	50005	0	2498	2	41389	624
2020-03-20	50005	0	2504	6	41891	502
2020-03-21	50005	0	2508	4	42354	463
2020-03-22	50005	0	2517	9	42788	434
2020-03-23	50006	1	2524	7	43214	426
2020-03-24	50006	0	2526	2	43686	472
2020-03-25	50006	0	2531	5	44068	382
2020-03-26	50006	0	2535	4	44591	523
2020-03-27	50006	0	2538	3	44951	360
2020-03-28	50006	0	2543	5	45418	467
2020-03-29	50006	0	2547	4	45733	315
2020-03-30	50006	0	2548	1	46002	269
2020-03-31	50007	1	2553	5	46175	173
2020-04-01	50007	0	2559	6	46320	145
2020-04-02	50007	0	2563	4	46461	141
2020-04-03	50008	1	2567	4	46611	150
2020-04-04	50008	0	2570	3	46794	183
2020-04-05	50008	0	2571	1	46863	69
2020-04-06	50008	0	2571	0	46922	59

## Sheet: Elman neural network and LSTM
Date	Cumulative confirmed cases	Cumulative deaths	Cumulative cured cases
2020-01-23	495	23	31
2020-01-24	572	38	32
2020-01-25	618	45	40
2020-01-26	698	63	42
2020-01-27	1590	85	45
2020-01-28	1905	104	75
2020-01-29	2261	129	82
2020-01-30	2639	159	103
2020-01-31	3215	192	139
2020-02-01	4109	224	171
2020-02-02	5142	265	224
2020-02-03	6384	313	303
2020-02-04	8351	362	368
2020-02-05	10117	414	431
2020-02-06	11618	478	534
2020-02-07	13603	545	698
2020-02-08	14982	608	877
2020-02-09	16902	681	1044
2020-02-10	18454	748	1206
2020-02-11	19558	820	1377
2020-02-12	32994	928	1915
2020-02-13	35991	1016	2016
2020-02-14	37914	1123	2502
2020-02-15	39462	1233	2915
2020-02-16	41152	1309	3458
2020-02-17	42752	1381	4219
2020-02-18	44412	1497	4895
2020-02-19	45027	1585	5448
2020-02-20	45346	1684	6214
2020-02-21	45660	1774	7206
2020-02-22	46201	1856	8171
2020-02-23	46607	1987	8946
2020-02-24	47071	2043	10337
2020-02-25	47441	2085	11793
2020-02-26	47824	2104	13328
2020-02-27	48137	2132	15826
2020-02-28	48557	2169	17552
2020-02-29	49122	2195	19227
2020-03-01	49315	2227	21185
2020-03-02	49426	2251	23031
2020-03-03	49540	2282	24890
2020-03-04	49671	2305	26316
2020-03-05	49797	2328	27354
2020-03-06	49871	2349	28511
2020-03-07	49912	2370	29770
2020-03-08	49948	2388	30933
2020-03-09	49965	2404	31829
2020-03-10	49978	2423	33041
2020-03-11	49986	2430	34094
2020-03-12	49991	2436	35197
2020-03-13	49995	2446	36451
2020-03-14	49999	2456	37632
2020-03-15	50003	2469	38384
2020-03-16	50004	2480	39220
2020-03-17	50005	2490	40032
2020-03-18	50005	2496	40765
2020-03-19	50005	2498	41389
2020-03-20	50005	2504	41891
2020-03-21	50005	2508	42354
2020-03-22	50005	2517	42788
2020-03-23	50006	2524	43214
2020-03-24	50006	2526	43686
2020-03-25	50006	2531	44068
2020-03-26	50006	2535	44591
2020-03-27	50006	2538	44951
2020-03-28	50006	2543	45418
2020-03-29	50006	2547	45733
2020-03-30	50006	2548	46002
2020-03-31	50007	2553	46175
2020-04-01	50007	2559	46320
2020-04-02	50007	2563	46461
2020-04-03	50008	2567	46611
2020-04-04	50008	2570	46794
2020-04-05	50008	2571	46863
2020-04-06	50008	2571	46922
	datas of April 4 and April 5 are also include in training samples

## Sheet: SVM
Date	Cumulative confirmed cases	Cumulative deaths	Cumulative cured cases
2020-01-23	495	23	31
2020-01-24	572	38	32
2020-01-25	618	45	40
2020-01-26	698	63	42
2020-01-27	1590	85	45
2020-01-28	1905	104	75
2020-01-29	2261	129	82
2020-01-30	2639	159	103
2020-01-31	3215	192	139
2020-02-01	4109	224	171
2020-02-02	5142	265	224
2020-02-03	6384	313	303
2020-02-04	8351	362	368
2020-02-05	10117	414	431
2020-02-06	11618	478	534
2020-02-07	13603	545	698
2020-02-08	14982	608	877
2020-02-09	16902	681	1044
2020-02-10	18454	748	1206
2020-02-11	19558	820	1377
2020-02-12	32994	928	1915
2020-02-13	35991	1016	2016
2020-02-14	37914	1123	2502
2020-02-15	39462	1233	2915
2020-02-16	41152	1309	3458
2020-02-17	42752	1381	4219
2020-02-18	44412	1497	4895
2020-02-19	45027	1585	5448
2020-02-20	45346	1684	6214
2020-02-21	45660	1774	7206
2020-02-22	46201	1856	8171
2020-02-23	46607	1987	8946
2020-02-24	47071	2043	10337
2020-02-25	47441	2085	11793
2020-02-26	47824	2104	13328
2020-02-27	48137	2132	15826
2020-02-28	48557	2169	17552
2020-02-29	49122	2195	19227
2020-03-01	49315	2227	21185
2020-03-02	49426	2251	23031
2020-03-03	49540	2282	24890
2020-03-04	49671	2305	26316
2020-03-05	49797	2328	27354
2020-03-06	49871	2349	28511
2020-03-07	49912	2370	29770
2020-03-08	49948	2388	30933
2020-03-09	49965	2404	31829
2020-03-10	49978	2423	33041
2020-03-11	49986	2430	34094
2020-03-12	49991	2436	35197
2020-03-13	49995	2446	36451
2020-03-14	49999	2456	37632
2020-03-15	50003	2469	38384
2020-03-16	50004	2480	39220
2020-03-17	50005	2490	40032
2020-03-18	50005	2496	40765
2020-03-19	50005	2498	41389
2020-03-20	50005	2504	41891
2020-03-21	50005	2508	42354
2020-03-22	50005	2517	42788
2020-03-23	50006	2524	43214
2020-03-24	50006	2526	43686
2020-03-25	50006	2531	44068
2020-03-26	50006	2535	44591
2020-03-27	50006	2538	44951
2020-03-28	50006	2543	45418
2020-03-29	50006	2547	45733
2020-03-30	50006	2548	46002
2020-03-31	50007	2553	46175
2020-04-01	50007	2559	46320
2020-04-02	50007	2563	46461
2020-04-03	50008	2567	46611
2020-04-04	50008	2570	46794
2020-04-05	50008	2571	46863
2020-04-06	50008	2571	46922

## Sheet: SVM with fuzzy granulation
Date	Confirmed new cases	New deaths	New cured cases
2020-01-23	70	6	3
2020-01-24	77	15	1
2020-01-25	46	7	8
2020-01-26	80	18	2
2020-01-27	892	22	3
2020-01-28	315	19	30
2020-01-29	356	25	7
2020-01-30	378	30	21
2020-01-31	576	33	36
2020-02-01	894	32	32
2020-02-02	1033	41	53
2020-02-03	1242	48	79
2020-02-04	1967	49	65
2020-02-05	1766	52	63
2020-02-06	1501	64	103
2020-02-07	1985	67	164
2020-02-08	1379	63	179
2020-02-09	1920	73	167
2020-02-10	1552	67	162
2020-02-11	1104	72	171
2020-02-12	13436	108	538
2020-02-13	3910	88	101
2020-02-14	1923	107	486
2020-02-15	1548	110	413
2020-02-16	1690	76	543
2020-02-17	1600	72	761
2020-02-18	1660	116	676
2020-02-19	615	88	553
2020-02-20	319	99	766
2020-02-21	314	90	992
2020-02-22	541	82	965
2020-02-23	348	131	772
2020-02-24	464	56	1391
2020-02-25	370	42	1456
2020-02-26	383	19	1535
2020-02-27	313	28	2498
2020-02-28	420	37	1726
2020-02-29	565	26	1675
2020-03-01	193	32	1958
2020-03-02	111	24	1846
2020-03-03	114	31	1859
2020-03-04	131	23	1426
2020-03-05	126	23	1038
2020-03-06	74	21	1157
2020-03-07	41	21	1259
2020-03-08	36	18	1163
2020-03-09	17	16	896
2020-03-10	13	19	1212
2020-03-11	8	7	1053
2020-03-12	5	6	1103
2020-03-13	4	10	1254
2020-03-14	4	10	1181
2020-03-15	4	13	752
2020-03-16	1	11	836
2020-03-17	1	10	812
2020-03-18	0	6	733
2020-03-19	0	2	624
2020-03-20	0	6	502
2020-03-21	0	4	463
2020-03-22	0	9	434
2020-03-23	1	7	426
2020-03-24	0	2	472
2020-03-25	0	5	382
2020-03-26	0	4	523
2020-03-27	0	3	360
2020-03-28	0	5	467
2020-03-29	0	4	315
2020-03-30	0	1	269
2020-03-31	1	5	173
2020-04-01	0	6	145
2020-04-02	0	4	141
2020-04-03	1	4	150
2020-04-04	0	3	183
2020-04-05	0	1	69
2020-04-06	0	0	59
